# Supplementary material for: Optimized Workflow for On-Line Derivatization for Targeted Metabolomics Approach by Gas Chromatography-Mass Spectrometry
Source: MDPI journal article supplement (doi:10.3390/metabo11120888), 2021-12-18
Supplement: s1 [file s1]

Supplementary material for

# Optimized Workflow for On-Line Derivatization for Targeted Metabolomics Approach by Gas Chromatography-Mass Spectrometry

Raphaela Fritsche-Guenther <sup>1</sup>, Yoann Gloaguen <sup>1,2</sup>, Anna Bauer <sup>1</sup>, Tobias Opialla <sup>1</sup>, Stefan Kempa <sup>3</sup>, Christina A. Fleming <sup>4</sup>, Paul H. Redmond <sup>4</sup>, Jennifer A. Kirwan <sup>1,\*</sup>

<sup>1</sup> Berlin Institute of Health (BIH) @ Charité—Universitätsmedizin Berlin, BIH Metabolomics Platform, 13125 Berlin, Germany; Raphaela.fritsche@charite.de (R.F.-G.); yoann.gloaguen@mdc-berlin.de (Y.G.); anabauer@ual.com (A.B.); tobias.opialla@mdc-berlin.de (T.O.); jennifer.kirwan@charite.de (J.A.K.)

<sup>2</sup> Berlin Institute of Health (BIH) @ Charité—Universitätsmedizin Berlin, Core Unit Bioinformatics, 10117 Berlin, Germany

<sup>3</sup> Max Delbrück Center for Molecular Medicine (MDC) in the Helmholtz Association, Berlin Institute of Medical Systems Biology, 10115 Berlin, Germany; Stefan.kempa@mdc-berlin.de

<sup>4</sup> Department of Academic Surgery, Cork University Hospital, T12 DFK4 Cork, Ireland; christinafleming49@gmail.com (C.A.F.); henry.redmond@hse.ie (H.P.R.)

\* Correspondence: jennifer.kirwan@charite.de

**Supplementary Table S1.** List of metabolite derivatives and their biological group used for reference search. MeOX: Methoxyamine hydrochloride. PPP: Pentose phosphate pathway. SCFA: short chain fatty acid. TCA: Tricarboxylic acid cycle. TMS: Trimethylsilyl derivatives.

| Biological class | Metabolite                | Detected as          |
|------------------|---------------------------|----------------------|
| Amino acid       | Alanine                   | 2TMS or 3TMS         |
| Amino acid       | Asparagine                | 2TMS                 |
| Amino acid       | Aspartic acid             | 2TMS or 3TMS         |
| Amino acid       | Cysteine                  | 3TMS                 |
| Amino acid       | Glycine                   | 2TMS or 3TMS         |
| Amino acid       | Isoleucine                | 1TMS or 2TMS         |
| Amino acid       | Leucine                   | 1TMS or 2TMS         |
| Amino acid       | Lysine                    | 3TMS                 |
| Amino acid       | Methionine                | 1TMS or 2TMS         |
| Amino acid       | Phenylalanine             | 1TMS or 2TMS         |
| Amino acid       | Proline                   | 1TMS or 2TMS         |
| Amino acid       | Serine                    | 2TMS or 3TMS or 4TMS |
| Amino acid       | Threonine                 | 2TMS or 3TMS         |
| Amino acid       | Tryptophan                | 2TMS                 |
| Amino acid       | Tyrosine                  | 3TMS                 |
| Amino acid       | Valine                    | 1TMS, 2TMS           |
| Glycolysis       | Fructose-6-phosphate      | 1MeOx 6TMS           |
| Glycolysis       | Glucose-6-phosphate       | 1MeOx 6TMS           |
| Glycolysis       | Glyceric acid-3-phosphate | 4TMS                 |
| Glycolysis       | Lactic acid               | 2TMS                 |
| Glycolysis       | Phosphoenolpyruvic acid   | 3TMS                 |
| Glycolysis       | Pyruvic acid              | 1MeOx 1TMS           |
| TCA              | Citric acid               | 4TMS                 |

|                          |                            |              |
|--------------------------|----------------------------|--------------|
| TCA                      | Fumaric acid               | 2TMS         |
| TCA                      | Glutaric acid, 2-hydroxy   | 3TMS         |
| TCA                      | Glutaric acid, 2-oxo       | 1MeOx 2TMS   |
| TCA                      | Malic acid                 | 3TMS         |
| TCA                      | Succinic acid              | 2TMS         |
| Others (Nucleotide)      | Adenine                    | 2TMS         |
| Others (Nucleotide)      | Uracil                     | 2TMS         |
| Others (Nucleobase)      | Adenosine                  | 3TMS or 4TMS |
| Others (Nucleobase)      | Cytosine                   | 2TMS         |
| Others (Glycerol)        | Dihydroxyacetone phosphate | 1MeOx 3TMS   |
| Others (Glycerol)        | Glycerol                   | 3TMS         |
| Others (Glycerol)        | Glycerol-3-phosphate       | 4TMS         |
| Others (Glycerol)        | Glyceric acid              | 3TMS         |
| Others (SCFA)            | Butanoic acid, 3-hydroxy   | 2TMS         |
| Others (SCFA)            | Butanoic acid, 4-amino     | 3TMS         |
| Others (Sugar alcohol)   | Erythritol                 | 4TMS         |
| Others (Carboxylic acid) | Glutaric acid              | 2TMS         |
| Others (PPP)             | Ribose-5-phosphate         | 1MeOx 5TMS   |
| Others (PPP)             | Ribose                     | 1MeOx 4TMS   |

**Supplementary Table S2.** Composition of the calibration mix dilution for high (1:1), middle (1:10) and low (1:100) concentration (nM) used for each metabolite.

| Metabolite                 | 1:1 (nM) | 1:10 (nM) | 1:100 (nM) |
|----------------------------|----------|-----------|------------|
| Adenine                    | 7.40     | 0.74      | 0.074      |
| Adenosine                  | 18.71    | 1.87      | 0.187      |
| Alanine                    | 134.70   | 13.47     | 1.347      |
| Asparagine                 | 22.71    | 2.27      | 0.227      |
| Aspartic acid              | 15.03    | 1.50      | 0.150      |
| Butanoic acid, 3-hydroxy   | 28.82    | 2.88      | 0.288      |
| Butanoic acid, 4-amino     | 9.70     | 0.97      | 0.097      |
| Citric acid                | 52.05    | 5.21      | 0.521      |
| Cysteine                   | 8.25     | 0.83      | 0.083      |
| Cytosine                   | 9.00     | 0.90      | 0.090      |
| Dihydroxyacetone phosphate | 88.18    | 8.82      | 0.882      |
| Erythritol                 | 81.89    | 8.19      | 0.819      |
| Fructose-6-phosphate       | 13.15    | 1.32      | 0.132      |
| Fumaric acid               | 34.46    | 3.45      | 0.345      |
| Glucose 6-phosphate        | 32.88    | 3.29      | 0.329      |
| Glutaric acid              | 30.28    | 3.03      | 0.303      |
| Glutaric acid, 2-hydroxy   | 57.27    | 5.73      | 0.573      |
| Glutaric acid, 2-oxo       | 34.22    | 3.42      | 0.342      |
| Glyceric acid              | 15.99    | 1.60      | 0.160      |
| Glyceric acid-3-phosphate  | 43.48    | 4.35      | 0.435      |

---

|                         |        |       |       |
|-------------------------|--------|-------|-------|
| Glycerol                | 65.15  | 6.52  | 0.652 |
| Glycerol-3-phosphate    | 27.00  | 2.70  | 0.270 |
| Glycine                 | 66.60  | 6.66  | 0.666 |
| Isoleucine              | 38.12  | 3.81  | 0.381 |
| Lactic acid             | 446.19 | 44.62 | 4.462 |
| Leucine                 | 91.48  | 9.15  | 0.915 |
| Lysine                  | 20.53  | 2.05  | 0.205 |
| Malic acid              | 44.75  | 4.47  | 0.447 |
| Methionine              | 6.70   | 0.67  | 0.067 |
| Phenylalanine           | 48.43  | 4.84  | 0.484 |
| Phosphoenolpyruvic acid | 15.04  | 1.50  | 0.150 |
| Proline                 | 60.80  | 6.08  | 0.608 |
| Pyruvic acid            | 290.80 | 29.08 | 2.908 |
| Ribose                  | 19.98  | 2.00  | 0.200 |
| Ribose-5-phosphate      | 91.21  | 9.12  | 0.912 |
| Serine                  | 114.19 | 11.42 | 1.142 |
| Succinic acid           | 42.34  | 4.23  | 0.423 |
| Threonine               | 167.90 | 16.79 | 1.679 |
| Tryptophan              | 9.79   | 0.98  | 0.098 |
| Tyrosine                | 11.04  | 1.10  | 0.110 |
| Uracil                  | 26.76  | 2.68  | 0.268 |
| Valine                  | 42.68  | 4.27  | 0.427 |

**Supplementary Table S3.** Off-line and on-line parameters for optimization of the method.

|               | Parameters                 | Off-line                  | On-line                                                | On-line optimized                            | Remarks                                                                        |
|---------------|----------------------------|---------------------------|--------------------------------------------------------|----------------------------------------------|--------------------------------------------------------------------------------|
| MeOx/pyridine | Volume (μL)                | 20                        | 20                                                     | 20                                           | Tested                                                                         |
|               | Time (minutes)             | 90                        | 90                                                     | 60                                           | Tested                                                                         |
|               | Temperature (°C)           | 30                        | 37                                                     | 30                                           | Tested                                                                         |
|               | Shaking                    | Thermoshaker 800 rpm      | 4 min quick mix 1,500 rpm followed by agitator 750 rpm | Agitator 250 rpm                             | Reduces spread of sample and white ring formation due to high speed of mixing. |
|               | Preparation                | Same time for all samples | Fresh every 24 hours                                   | At the beginning preparation of all aliquots | After addition of fresh MeOx the peak areas of alkane 32 decreased.            |
|               | Volume (μL)                | 80                        | 80                                                     | 80                                           |                                                                                |
| MSTFA         | Time (minutes)             | 60                        | 60                                                     | 30                                           | Tested                                                                         |
|               | Temperature (°C)           | 37                        | 37                                                     | 30                                           | Tested                                                                         |
|               | Shaking                    | Thermoshaker 800 rpm      | 4 min quick mix 1,500 rpm followed by agitator 750 rpm | Agitator 250 rpm                             | Reduces spread of sample and white ring formation due to high speed of mixing. |
|               | Preparation                | Same time for all samples | Fresh every 24 hours                                   | At the beginning preparation of all aliquots |                                                                                |
|               | Equilibration time (hours) | Variable for all samples  | 4                                                      | 4                                            | Tested                                                                         |
|               | 10 μL syringe              | Wash after injection      | Wash after injection                                   | Wash after injection                         |                                                                                |
|               | Fill speed                 | 30 μL/s                   | 30 μL/s                                                | 10 μL/s                                      | Reduces misinjections                                                          |
|               | Eject speed                | 50 μL/s                   | 50 μL/s                                                | 30 μL/s                                      | Reduces misinjections                                                          |
|               | Fill stroke                | 5 μL                      | 5 μl                                                   | 10 μl                                        | Improved mixing of MeOx/Pyridine                                               |
|               | Fill volume                | 1 μL                      | 1 μL                                                   | 2 μL                                         | Reduces air bubbles and misinjections                                          |
|               | 100 μL syringe             |                           | No washing step                                        | Wash after injection                         | Prolongs lifetime of syringe                                                   |
|               | Fill speed                 | Not used                  | 30 μL/s                                                | 10 μL/s                                      | Reduces misinjections                                                          |
|               | Eject speed                |                           | 50 μL/s                                                | 20 μL/s                                      | Reduces misinjections                                                          |

| Fill volume | 80 µL | 90 µL | Reduces air bubbles |
|-------------|-------|-------|---------------------|
|-------------|-------|-------|---------------------|

**Supplementary Table S4.** MeOx volume tested for optimization of derivatization conditions. Table of relative standard deviations (RSD) per compound and the median RSD overall and per biological classes in % for the scaled peak areas per metabolite. CMD: calibration mix dilution. Number of replicates vary due to occasional misinjections.

| Metabolite/<br>biological class | Volume<br><br>CMD<br>Replicates | 20 µL  | 40 µL  | 60 µL  | 20 µL   | 40 µL   | 60 µL   | 20 µL    | 40 µL    | 60 µL    |
|---------------------------------|---------------------------------|--------|--------|--------|---------|---------|---------|----------|----------|----------|
|                                 |                                 | 1<br>5 | 1<br>5 | 1<br>5 | 10<br>5 | 10<br>5 | 10<br>4 | 100<br>5 | 100<br>5 | 100<br>4 |
| Asparagine                      | AA                              | 47     | 74     | 27     | 14      | 47      | 46      | NA       | NA       | NA       |
| Lysine                          | AA                              | 55     | 17     | 14     | 29      | 45      | 107     | 49       | NA       | 7        |
| Tryptophan                      | AA                              | 56     | 47     | 29     | NA      | NA      | NA      | NA       | NA       | NA       |
| Alanine                         | AA                              | 18     | 26     | 30     | 47      | 33      | 30      | 66       | 84       | 34       |
| Aspartic acid                   | AA                              | 76     | 103    | 101    | 189     | 58      | 37      | 5        | 44       | 26       |
| Glycine                         | AA                              | 12     | 7      | 14     | 22      | 19      | 35      | 33       | 40       | 27       |
| Isoleucine                      | AA                              | 13     | 17     | 15     | 20      | 37      | 18      | NA       | NA       | NA       |
| Leucine                         | AA                              | 11     | 3      | 13     | 12      | 20      | 27      | 48       | 51       | 12       |
| Methionine                      | AA                              | 21     | 11     | 14     | NA      | NA      | NA      | NA       | 45       | 7        |
| Phenylalanine                   | AA                              | 17     | 9      | 12     | 15      | 27      | 34      | 41       | 53       | NA       |
| Proline                         | AA                              | 12     | 5      | 12     | 21      | 49      | 40      | NA       | NA       | NA       |
| Serine                          | AA                              | 13     | 4      | 12     | 16      | 33      | 35      | 112      | 49       | 29       |
| Threonine                       | AA                              | 26     | 8      | 13     | 17      | 38      | 47      | 41       | 47       | 20       |
| Valine                          | AA                              | 10     | 4      | 12     | 11      | 18      | 22      | 35       | 37       | 47       |
| Median RSD                      |                                 | 17     | 10     | 14     | 18      | 35      | 35      | 41       | 47       | 26       |
| Fructose-6-phosphate            | Glycolysis                      | 51     | 57     | 26     | NA      | 94      | NA      | NA       | NA       | NA       |
| Glucose-6-phosphate             | Glycolysis                      | 22     | 45     | 24     | 55      | NA      | NA      | NA       | NA       | NA       |
| Glyceric acid-3-phosphate       | Glycolysis                      | 54     | 51     | 26     | 54      | 42      | 66      | NA       | NA       | NA       |
| Lactic acid                     | Glycolysis                      | 53     | 14     | 25     | 32      | 16      | 32      | 21       | 37       | 26       |
| Phosphoenolpyruvic acid         | Glycolysis                      | 59     | 88     | 77     | 29      | 20      | 28      | NA       | NA       | NA       |
| Pyruvic acid                    | Glycolysis                      | 56     | 67     | 40     | 16      | 42      | 50      | 84       | 53       | 20       |
| Median RSD                      |                                 | 54     | 54     | 26     | 32      | 42      | 41      | 52       | 45       | 23       |
| Citric acid                     | TCA                             | 54     | 27     | 10     | 18      | 35      | 47      | 26       | 15       | 19       |
| Fumaric acid                    | TCA                             | 10     | 5      | 10     | 11      | 13      | 17      | 31       | 11       | 32       |
| Glutaric acid, 2-hydroxy        | TCA                             | 19     | 22     | 12     | 13      | 12      | 19      | NA       | NA       | NA       |
| Glutaric acid, 2-oxo            | TCA                             | 48     | 36     | 35     | 14      | 32      | 17      | 29       | 46       | 39       |
| Malic acid                      | TCA                             | 10     | 5      | 14     | 10      | 15      | 25      | 18       | 16       | 11       |
| Succinic acid                   | TCA                             | 9      | 3      | 12     | 12      | 14      | 24      | 11       | 13       | 14       |
| Median RSD                      |                                 | 14     | 13     | 12     | 12      | 15      | 22      | 26       | 15       | 19       |
| Adenine                         | Others                          | 49     | 52     | NA     | 24      | NA      | NA      | NA       | NA       | NA       |
| Adenosine                       | Others                          | NA     | 27     | NA     | NA      | NA      | NA      | NA       | NA       | NA       |
| Cytosine                        | Others                          | 26     | 44     | 36     | NA      | 25      | 71      | NA       | NA       | NA       |

|                          |        |    |    |    |    |    |     |    |    |    |
|--------------------------|--------|----|----|----|----|----|-----|----|----|----|
| Uracil                   | Others | 9  | 7  | 11 | 12 | 26 | 38  | 55 | 25 | 52 |
| Butanoic acid, 3-hydroxy | Others | 8  | 2  | 40 | 11 | 7  | 20  | 17 | 17 | 28 |
| Butanoic acid, 4-amino   | Others | 14 | 20 | 20 | 35 | 20 | 27  | 37 | 6  | NA |
| Glycerol                 | Others | 9  | 1  | 10 | 14 | 15 | 25  | 8  | 11 | 7  |
| Glycerol-3-phosphate     | Others | 54 | 37 | 16 | 48 | 53 | 143 | 25 | 30 | 13 |
| Glutaric acid            | Others | 11 | 3  | 12 | 10 | 13 | 19  | 13 | 15 | 16 |
| Glyceric acid            | Others | 10 | 8  | 11 | 14 | 13 | 20  | 10 | 22 | 4  |
| Ribose-5-phosphate       | Others | 93 | 15 | 49 | 31 | 66 | 112 | NA | NA | NA |
| Ribose                   | Others | 35 | 54 | 40 | 59 | 70 | 66  | 53 | 21 | 22 |
| Median RSD               |        | 14 | 17 | 18 | 19 | 23 | 33  | 21 | 19 | 16 |
| Median RSD all           |        | 21 | 17 | 15 | 17 | 27 | 33  | 32 | 34 | 20 |
| Number compounds         |        | 37 | 38 | 36 | 33 | 33 | 32  | 24 | 24 | 22 |

**Supplementary Table S5.** Incubation time tested for optimization of derivatization conditions. Table of relative standard deviations (RSD) per compound and the median RSD overall and per biological classes in % for the scaled peak areas per metabolite. CMD: calibration mix dilution. Number of replicates vary due to occasional misinjections.

| Metabolite/<br>biological class | Time<br>(min) | 30/30      | 60/30 | 90/60 | 30/30 | 60/30 | 90/60 | 30/30 | 60/30 | 90/60 |
|---------------------------------|---------------|------------|-------|-------|-------|-------|-------|-------|-------|-------|
|                                 |               | CMD        | 1     | 1     | 1     | 10    | 10    | 10    | 100   | 100   |
|                                 |               | Replicates | 5     | 3     | 5     | 4     | 3     | 5     | 4     | 3     |
| Asparagine                      | AA            |            | 82    | 46    | 12    | 12    | 12    | 54    | NA    | NA    |
| Cysteine                        | AA            |            | NA    | NA    | 2     | NA    | NA    | NA    | NA    | NA    |
| Lysine                          | AA            |            | 13    | 19    | 10    | 60    | NA    | NA    | 19    | 69    |
| Tryptophan                      | AA            |            | 85    | NA    | 85    | 44    | 76    | 58    | NA    | NA    |
| Tyrosine                        | AA            |            | 20    | 13    | 69    | NA    | 43    | NA    | NA    | NA    |
| Alanine                         | AA            |            | 7     | 12    | 6     | 20    | 25    | 19    | 23    | 74    |
| Aspartic acid                   | AA            |            | 15    | 37    | 52    | 128   | 19    | 63    | 31    | NA    |
| Glycine                         | AA            |            | 9     | 18    | 10    | 11    | 6     | 15    | 23    | 102   |
| Isoleucine                      | AA            |            | 13    | 21    | 14    | 35    | 15    | 28    | 48    | 40    |
| Leucine                         | AA            |            | 10    | 93    | 47    | 14    | 6     | 15    | 12    | 79    |
| Methionine                      | AA            |            | 18    | 35    | 6     | NA    | 28    | NA    | NA    | NA    |
| Phenylalanine                   | AA            |            | 12    | 17    | 10    | 43    | 10    | 35    | NA    | NA    |
| Proline                         | AA            |            | 12    | 13    | 46    | 25    | 16    | 15    | 16    | 92    |
| Serine                          | AA            |            | 8     | 13    | 11    | 13    | 6     | 11    | 17    | 93    |
| Threonine                       | AA            |            | 10    | 19    | 13    | 19    | 14    | 19    | 31    | 83    |
| Valine                          | AA            |            | 12    | 13    | 9     | 8     | 4     | 16    | 10    | 75    |
| Median RSD                      |               |            | 12    | 18    | 11    | 20    | 14    | 19    | 21    | 79    |
| Fructose-6-phosphate            | Glycolysis    |            | 16    | 22    | 11    | NA    | 5     | NA    | NA    | NA    |
| Glucose-6-phosphate             | Glycolysis    |            | 26    | 26    | 5     | NA    | NA    | NA    | NA    | NA    |
| Glyceric acid-3-phosphate       | Glycolysis    |            | 18    | 5     | 56    | 37    | 45    | 23    | NA    | 91    |
| Lactic acid                     | Glycolysis    |            | 43    | 15    | 21    | 84    | 46    | 62    | 83    | 10    |
| Phosphoenolpyruvic acid         | Glycolysis    |            | 16    | 31    | 20    | 8     | 7     | 29    | NA    | NA    |

|                          |            |     |    |    |     |     |    |    |    |    |
|--------------------------|------------|-----|----|----|-----|-----|----|----|----|----|
| Pyruvic acid             | Glycolysis | 7   | 93 | 69 | 24  | 7   | 15 | 58 | 88 | 11 |
| Median RSD               |            | 17  | 24 | 21 | 31  | 7   | 26 | 71 | 88 | 12 |
| Citric acid              | TCA        | NA  | NA | NA | NA  | NA  | 14 | NA | NA | NA |
| Fumaric acid             | TCA        | 10  | 12 | 9  | 8   | 9   | 7  | NA | 56 | 8  |
| Glutaric acid, 2-hydroxy | TCA        | 10  | 14 | 9  | 9   | 6   | 7  | 32 | 81 | 17 |
| Glutaric acid, 2-oxo     | TCA        | 11  | 81 | 56 | 26  | 79  | 8  | NA | NA | NA |
| Malic acid               | TCA        | 7   | 7  | 10 | 16  | 6   | 12 | 43 | 85 | 18 |
| Succinic acid            | TCA        | 33  | 37 | 58 | 144 | 95  | 70 | 68 | 77 | 25 |
| Median RSD               |            | 13  | 17 | 12 | 23  | 14  | 18 | 27 | 76 | 16 |
| Butanoic acid            | Others     | 109 | 68 | 43 | NA  | NA  | NA | NA | NA | NA |
| Butanoic acid            | Others     | 25  | 48 | 16 | 23  | 130 | 45 | 22 | 27 | 46 |
| Butanoic acid, 4-amino   | Others     | 39  | NA | NA | 51  | 108 | 56 | 42 | 76 | NA |
| Cytosine                 | Others     | 8   | 4  | 12 | 52  | 47  | 18 | NA | NA | NA |
| Dihydroxyacetone-P       | Others     | 8   | 12 | NA | 64  | 22  | 21 | NA | NA | NA |
| Glutaric acid            | Others     | 13  | 17 | 12 | 15  | 16  | 15 | 19 | 66 | 11 |
| Glyceric acid            | Others     | 42  | 13 | 10 | 12  | 10  | 12 | 10 | 48 | NA |
| Glycerol                 | Others     | 9   | 13 | 8  | 6   | 5   | 14 | 31 | 55 | 27 |
| Glycerol-3-phosphate     | Others     | 67  | NA | 76 | 4   | 39  | NA | 37 | 66 | NA |
| Ribose                   | Others     | 15  | 28 | 19 | 84  | 3   | 78 | 12 | 79 | 23 |
| Ribose-5-phosphate       | Others     | 31  | 10 | 7  | 104 | NA  | NA | 4  | 83 | NA |
| Uracil                   | Others     | 9   | 14 | 9  | 8   | 10  | 8  | 44 | 61 | 16 |
| Median RSD               |            | 20  | 13 | 12 | 23  | 19  | 18 | 22 | 66 | 23 |
| Median RSD all           |            | 13  | 18 | 12 | 24  | 15  | 17 | 23 | 77 | 16 |
| Number compounds         |            | 37  | 34 | 36 | 33  | 34  | 31 | 24 | 25 | 19 |

**Supplementary Table S6.** Incubation temperature tested for optimization of derivatization conditions. Table of relative standard deviations (RSD) per compound and the median RSD overall and per biological classes in % for the scaled peak areas per metabolite. CMD: calibration mix dilution. Number of replicates vary due to occasional misinjections.

| Metabolite/<br>biological class | Tempera-<br>tur   | 30 °C  | 37 °C  | 45 °C  | 30 °C   | 37 °C   | 45 °C   | 30 °C    | 37 °C    | 45 °C    |
|---------------------------------|-------------------|--------|--------|--------|---------|---------|---------|----------|----------|----------|
|                                 | CMD<br>Replicates | 1<br>4 | 1<br>3 | 1<br>4 | 10<br>4 | 10<br>3 | 10<br>3 | 100<br>3 | 100<br>5 | 100<br>4 |
| Asparagine                      | AA                | 60     | 20     | 19     | 13      | NA      | 103     | NA       | 43       | NA       |
| Cysteine                        | AA                | NA     | 29     | 28     | NA      | 31      | 24      | NA       | NA       | NA       |
| Lysine                          | AA                | 64     | 9      | 17     | 21      | 12      | 17      | 35       | 73       | 59       |
| Tryptophan                      | AA                | NA     | 16     | 14     | 60      | 5       | 27      | NA       | 67       | 59       |
| Tyrosine                        | AA                | NA     | 19     | 20     | 18      | 12      | 24      | NA       | 76       | 47       |
| Alanine                         | AA                | 19     | 11     | 18     | 48      | 41      | 20      | 45       | NA       | NA       |
| Aspartic acid                   | AA                | 29     | NA     | NA     | 40      | NA      | NA      | NA       | NA       | NA       |
| Glycine                         | AA                | 15     | NA     | NA     | 7       | NA      | NA      | 23       | NA       | NA       |
| Isoleucine                      | AA                | 30     | 7      | 21     | 39      | 1       | 13      | 8        | 62       | NA       |
| Leucine                         | AA                | 17     | 10     | 13     | 7       | 4       | 17      | 24       | 85       | 60       |

|                           |            |    |    |    |    |    |    |     |    |    |
|---------------------------|------------|----|----|----|----|----|----|-----|----|----|
| Methionine                | AA         | 31 | 12 | 19 | 25 | 57 | 84 | NA  | NA | 46 |
| Phenylalanine             | AA         | 20 | 10 | 14 | 8  | 11 | 27 | 62  | 70 | 64 |
| Proline                   | AA         | 16 | 10 | 15 | 22 | 10 | 23 | 88  | 72 | 58 |
| Serine                    | AA         | 15 | 10 | 12 | 8  | 5  | 13 | 72  | 67 | 44 |
| Threonine                 | AA         | 68 | 7  | 12 | 10 | 6  | 19 | 47  | 73 | 65 |
| Valine                    | AA         | 18 | 11 | 21 | 8  | 6  | 15 | 38  | 64 | 69 |
| Median RSD                |            | 20 | 11 | 17 | 18 | 10 | 21 | 41  | 70 | 59 |
| Fructose-6-phosphate      | Glycolysis | 30 | 19 | 20 | 11 | 10 | 14 | 35  | NA | NA |
| Glucose-6-phosphate       | Glycolysis | 83 | 37 | 14 | 56 | 16 | 38 | 28  | 73 | 19 |
| Glyceric acid-3-phosphate | Glycolysis | 59 | 15 | 19 | 9  | 2  | 14 | 93  | 77 | 61 |
| Lactic acid               | Glycolysis | 31 | 18 | 20 | 39 | 3  | 11 | 70  | 81 | 59 |
| Phosphoenolpyruvic acid   | Glycolysis | 20 | 11 | 14 | 19 | 6  | 19 | NA  | 79 | 64 |
| Pyruvic acid              | Glycolysis | 25 | 49 | 48 | 21 | 10 | NA | 57  | NA | NA |
| Median RSD                |            | 30 | 18 | 20 | 20 | 8  | 14 | 57  | 78 | 60 |
| Citric acid               | TCA        | 55 | 21 | 40 | 11 | 21 | 87 | 46  | NA | NA |
| Fumaric acid              | TCA        | 23 | 17 | 13 | 5  | 2  | 11 | 25  | 43 | NA |
| Glutaric acid, 2-hydroxy  | TCA        | 22 | 8  | 11 | 6  | 17 | 6  | 32  | 56 | 39 |
| Glutaric acid, 2-oxo      | TCA        | 40 | 16 | 13 | 13 | 2  | 24 | 143 | 77 | 65 |
| Malic acid                | TCA        | 14 | 19 | 12 | 7  | 3  | 24 | 64  | 70 | 63 |
| Succinic acid             | TCA        | 17 | 10 | 12 | 6  | 15 | 18 | 29  | 77 | 69 |
| Median RSD                |            | 23 | 16 | 13 | 7  | 9  | 21 | 39  | 70 | 64 |
| Butanoic acid, 3-hydroxy  | Others     | 50 | 12 | 12 | 6  | 4  | 16 | 117 | 79 | 62 |
| Butanoic acid, 4-amino    | Others     | 22 | 30 | 16 | 4  | 16 | 10 | 36  | 66 | 58 |
| Dihydroxyacetone-P        | Others     | NA | 28 | 22 | 22 | 45 | 45 | NA  | 77 | 69 |
| Glycerol                  | Others     | 57 | 64 | 60 | 4  | 13 | 27 | 77  | 67 | 71 |
| Glycerol-3-phosphate      | Others     | 29 | 11 | 13 | 9  | 12 | 26 | 96  | 75 | 56 |
| Adenine                   | Others     | 47 | 93 | NA | NA | 15 | NA | NA  | 39 | NA |
| Cytosine                  | Others     | 18 | 9  | 12 | 39 | 5  | 25 | NA  | 66 | 60 |
| Uracil                    | Others     | 20 | 10 | NA | 11 | NA | NA | 107 | NA | NA |
| Glutaric acid             | Others     | 44 | 20 | 49 | 5  | 35 | 19 | 101 | 61 | 60 |
| Glyceric acid             | Others     | 24 | 16 | 27 | 4  | 85 | 38 | 24  | NA | NA |
| Ribose-5-phosphate        | Others     | 37 | 14 | 11 | 9  | 6  | 26 | 64  | 68 | 58 |
| Erythritol                | Others     | NA | 16 | 19 | NA | 38 | 50 | NA  | 8  | 47 |
| Ribose                    | Others     | 54 | 16 | 11 | 9  | 6  | 22 | 53  | 67 | 31 |
| Median RSD                |            | 37 | 16 | 16 | 9  | 14 | 26 | 77  | 67 | 59 |
| Median RSD all            |            | 29 | 16 | 16 | 10 | 10 | 22 | 50  | 70 | 59 |
| Number compounds          |            | 36 | 39 | 38 | 38 | 37 | 36 | 32  | 31 | 29 |

**Supplementary Table S7.** Equilibration time tested for optimization of derivatization conditions. Table of relative standard deviations (RSD) per compound and the median RSD overall and per biological classes in % for the scaled peak areas per metabolite. CMD: calibration mix dilution. Number of replicates vary due to occasional misinjections.

| Metabolite/<br>biological class | Time      | 0 h | 2 h | 4 h | 8 h | 0 h | 2 h | 4 h | 8 h | 0 h | 2 h | 4 h | 8 h |
|---------------------------------|-----------|-----|-----|-----|-----|-----|-----|-----|-----|-----|-----|-----|-----|
|                                 | CMD       | 1   | 1   | 1   | 1   | 10  | 10  | 10  | 10  | 100 | 100 | 100 | 100 |
|                                 | Replicate | 4   | 4   | 5   | 4   | 4   | 4   | 5   | 4   | 4   | 2   | 4   | 4   |



|                            |            |    |    |     |    |    |    |    |    |    |    |     |    |
|----------------------------|------------|----|----|-----|----|----|----|----|----|----|----|-----|----|
| Asparagine                 | AA         | 32 | 20 | 25  | 5  | 18 | 43 | 18 | 19 | NA | NA | NA  | NA |
| Cysteine                   | AA         | NA | NA | 38  | NA  | NA |
| Lysine                     | AA         | 57 | 11 | 26  | 20 | 22 | 23 | 31 | 25 | 29 | 24 | 8   | 11 |
| Tryptophan                 | AA         | 74 | 61 | 49  | 78 | NA | 48 | 25 | 44 | NA | NA | NA  | NA |
| Tyrosine                   | AA         | NA | NA | 41  | NA | 40 | NA | 12 | NA | NA | NA | NA  | NA |
| Adenosine                  | AA         | 50 | 30 | 90  | 62 | NA  | NA |
| Alanine                    | AA         | 26 | 38 | 34  | 29 | 56 | 76 | 31 | 45 | 81 | 38 | 28  | 34 |
| Glycine                    | AA         | 28 | 19 | 29  | 4  | 10 | 19 | 12 | 11 | 6  | 11 | 21  | 12 |
| Isoleucine                 | AA         | 25 | 21 | 117 | 19 | 36 | 52 | 32 | 79 | NA | NA | 120 | NA |
| Leucine                    | AA         | 20 | 3  | 26  | 6  | 5  | 82 | 6  | 10 | 12 | 3  | 35  | 10 |
| Methionine                 | AA         | 33 | 25 | 30  | 11 | NA | 26 | 32 | 27 | NA | NA | NA  | NA |
| Phenylalanine              | AA         | 15 | 7  | 26  | 7  | 7  | 14 | 7  | 7  | NA | NA | NA  | NA |
| Proline                    | AA         | 20 | 4  | 27  | 7  | 15 | 6  | 35 | 27 | 41 | 12 | 50  | 20 |
| Serine                     | AA         | 19 | 7  | 25  | 9  | 7  | 13 | 9  | 12 | 31 | 78 | 45  | 7  |
| Valine                     | AA         | 23 | 7  | 26  | 6  | 12 | 15 | 15 | 13 | 29 | 12 | 39  | 27 |
| Median RSD                 |            | 26 | 19 | 29  | 9  | 15 | 25 | 18 | 22 | 29 | 12 | 37  | 12 |
| Fructose-6-phosphate       | Glycolysis | 18 | 9  | 26  | 6  | 14 | 79 | 39 | 17 | NA | NA | NA  | 13 |
| Glucose-6-phosphate        | Glycolysis | 15 | 6  | 22  | 9  | 5  | 47 | 25 | 50 | NA | NA | 28  | 31 |
| Glyceric acid-3-phosphate  | Glycolysis | 14 | 12 | 30  | 10 | 24 | 5  | 10 | 17 | NA | NA | 78  | 21 |
| Lactic acid                | Glycolysis | 31 | 15 | 40  | 10 | 14 | 30 | 27 | 77 | 56 | 8  | 58  | 38 |
| Phosphoenolpyruvic acid    | Glycolysis | 16 | 23 | 37  | 7  | 25 | 11 | 14 | 21 | NA | NA | NA  | NA |
| Pyruvic acid               | Glycolysis | 33 | 12 | 27  | 15 | 64 | 36 | 5  | 53 | 68 | 21 | 36  | 16 |
| Median RSD                 |            | 17 | 12 | 29  | 9  | 19 | 33 | 19 | 35 | 62 | 8  | 47  | 21 |
| Citric acid                | TCA        | 19 | 15 | 24  | 12 | 8  | 27 | 16 | 10 | 30 | 60 | 39  | 17 |
| Fumaric acid               | TCA        | 21 | 9  | 27  | 66 | 8  | 13 | 7  | 11 | 12 | 33 | 19  | 10 |
| Glutaric acid, 2-hydroxy   | TCA        | 17 | 9  | 26  | 11 | 4  | 13 | 11 | 6  | 12 | NA | 33  | 9  |
| Glutaric acid, 2-oxo       | TCA        | 16 | 6  | 24  | 13 | 18 | 10 | 9  | 15 | 30 | 72 | 57  | 7  |
| Malic acid                 | TCA        | 19 | 9  | 26  | 11 | 5  | 15 | 12 | 4  | 31 | 31 | 27  | 16 |
| Succinic acid              | TCA        | 22 | 8  | 28  | 10 | 4  | 19 | 9  | 7  | 18 | 16 | 19  | 10 |
| Median RSD                 |            | 19 | 9  | 26  | 12 | 6  | 14 | 10 | 9  | 24 | 33 | 30  | 10 |
| Adenine                    | Others     | 18 | 17 | 21  | 18 | NA | 60 | 39 | NA | NA | NA | NA  | NA |
| Butanoic acid, 3-hydroxy   | Others     | 24 | 10 | 28  | 12 | 5  | 16 | 8  | 6  | 9  | 3  | 27  | 13 |
| Butanoic acid, 4-amino     | Others     | 21 | 16 | 28  | 4  | 10 | 27 | 16 | 14 | 11 | 28 | 21  | 18 |
| Cytosine                   | Others     | 18 | 6  | 26  | 6  | 68 | 47 | 35 | 32 | NA | NA | NA  | NA |
| Dihydroxyacetone phosphate | Others     | NA | NA | NA  | NA | 71 | 64 | NA | NA | NA | NA | NA  | NA |
| Glutaric acid              | Others     | 23 | 7  | 27  | 11 | 5  | 16 | 11 | 7  | 20 | 11 | 21  | 8  |
| Glyceric acid              | Others     | 19 | 64 | 28  | 66 | 6  | 10 | 8  | 10 | 17 | 20 | 22  | 18 |

|                      |        |    |    |    |    |    |     |    |    |     |    |    |    |
|----------------------|--------|----|----|----|----|----|-----|----|----|-----|----|----|----|
| Glycerol             | Others | 21 | 63 | 60 | 63 | 60 | 17  | 7  | 8  | 14  | 3  | 21 | 44 |
| Glycerol-3-phosphate | Others | 56 | 16 | 32 | 19 | 26 | 13  | 25 | 24 | 142 | 89 | 69 | 38 |
| Ribose               | Others | 24 | 11 | 27 | 16 | 4  | 75  | 17 | 15 | 27  | 20 | 72 | 35 |
| Ribose-5-phosphate   | Others | 88 | 74 | 71 | 34 | 8  | 101 | 15 | 22 | 60  | 41 | 46 | 12 |
| Uracil               | Others | 20 | 8  | 28 | 5  | 10 | 15  | 17 | 14 | 29  | 30 | 36 | 22 |
| Median RSD           |        | 21 | 16 | 28 | 16 | 10 | 22  | 16 | 14 | 20  | 20 | 27 | 18 |
| Median RSD all       |        | 21 | 11 | 28 | 11 | 11 | 21  | 15 | 15 | 29  | 21 | 35 | 16 |
| Number compounds     |        | 36 | 36 | 38 | 36 | 34 | 36  | 36 | 34 | 25  | 24 | 27 | 27 |

**Supplementary Table S8.** Individual relative standard deviation (RSD in %) per compound in n=45 human plasma samples. AA: amino acids. TCA: Tricarboxylic acid cycle.

| Metabolite               | Biological class | RSD |
|--------------------------|------------------|-----|
| Alanine                  | AA               | 28  |
| Glycine                  | AA               | 17  |
| Leucine                  | AA               | 18  |
| Lysine                   | AA               | 17  |
| Methionine               | AA               | 19  |
| Ornithine                | AA               | 12  |
| Phenylalanine            | AA               | 12  |
| Proline                  | AA               | 21  |
| Serine                   | AA               | 16  |
| Threonine                | AA               | 27  |
| Tryptophan               | AA               | 24  |
| Tyrosine                 | AA               | 26  |
| Valine                   | AA               | 11  |
| Lactic acid              | Glycolysis       | 13  |
| Pyruvic acid             | Glycolysis       | 12  |
| Citric acid              | TCA              | 15  |
| Malic acid               | TCA              | 13  |
| Succinic acid            | TCA              | 16  |
| Butanoic acid, 3-hydroxy | Otherrs          | 12  |
| Erythritol               | Otherrs          | 15  |
| Glyceric acid            | Otherrs          | 19  |
| Glycerol                 | Otherrs          | 15  |
| Ribose-5-phosphate       | Otherrs          | 20  |

**Supplementary Table S9.** Individual relative standard deviation (RSD in %) per compound in n=18 mouse liver samples. AA: amino acids. TCA: Tricarboxylic acid cycle.

| Metabolite    | Biological class | RSD |
|---------------|------------------|-----|
| Alanine       | AA               | 13  |
| Aspartic acid | AA               | 5   |

|                           |            |    |
|---------------------------|------------|----|
| Cysteine                  | AA         | 12 |
| Glycine                   | AA         | 4  |
| Lysine                    | AA         | 7  |
| Methionine                | AA         | 25 |
| Phenylalanine             | AA         | 2  |
| Proline                   | AA         | 21 |
| Serine                    | AA         | 17 |
| Threonine                 | AA         | 13 |
| Tryptophan                | AA         | 29 |
| Tyrosine                  | AA         | 47 |
| Valine                    | AA         | 10 |
| Fructose-6-phosphate      | Glycolysis | 5  |
| Glucose-6-phosphate       | Glycolysis | 47 |
| Glyceric acid-3-phosphate | Glycolysis | 7  |
| Lactic acid               | Glycolysis | 22 |
| Phosphoenolpyruvic acid   | Glycolysis | 19 |
| Pyruvic acid              | Glycolysis | 28 |
| Citric acid               | TCA        | 3  |
| Fumaric acid              | TCA        | 6  |
| Glutaric acid, 2-hydroxy  | TCA        | 3  |
| Glutaric acid, 2-oxo      | TCA        | 10 |
| Malic acid                | TCA        | 2  |
| Succinic acid             | TCA        | 2  |
| Adenosine                 | Others     | 7  |
| Butanoic acid, 3-hydroxy  | Others     | 3  |
| Butanoic acid, 4-amino    | Others     | 56 |
| Cytosine                  | Others     | 23 |
| Glutaric acid             | Others     | 3  |
| Glyceric acid             | Others     | 10 |
| Glycerol-3-phosphate      | Others     | 3  |
| Glycerol                  | Others     | 29 |
| Ribose-5-phosphate        | Others     | 22 |
| Ribulose-5-phosphate      | Others     | 5  |
| Ribose                    | Others     | 29 |
| Uracil                    | Others     | 30 |

**Supplementary Table S10.** Individual relative standard deviation (RSD in %) per compound in n=9 pooled quality control samples from three batches. AA: amino acids. TCA: Tricarboxylic acid cycle.

| Metabolite    | Biological class | Batch 1 | Batch 2 | Batch 3 |
|---------------|------------------|---------|---------|---------|
| Alanine       | AA               | 18      | 35      | 22      |
| Aspartic acid | AA               | 25      | 19      | 26      |
| Glycine       | AA               | 22      | 15      | 13      |
| Leucine       | AA               | 11      | 19      | 22      |

|                          |            |    |    |    |
|--------------------------|------------|----|----|----|
| Lysine                   | AA         | 18 | 24 | 17 |
| Methionine               | AA         | 3  | 20 | 14 |
| Ornithine                | AA         | 19 | 24 | 19 |
| Phenylalanine            | AA         | 25 | 30 | 34 |
| Proline                  | AA         | 42 | 69 | 32 |
| Serine                   | AA         | 21 | 15 | 26 |
| Threonine                | AA         | 29 | 20 | 28 |
| Tryptophan               | AA         | 39 | 27 | 27 |
| Valine                   | AA         | 24 | 32 | 27 |
| Glucose-6-phosphate      | Glycolysis | 21 | 20 | 22 |
| Lactic acid              | Glycolysis | 13 | 12 | 19 |
| Pyruvic acid             | Glycolysis | 25 | 21 | 14 |
| Citric acid              | TCA        | 19 | 22 | 39 |
| Malic acid               | TCA        | 23 | 18 | 38 |
| Succinic acid            | TCA        | 27 | 31 | 14 |
| Butanoic acid, 3-hydroxy | Others     | 14 | 20 | 20 |
| Glyceric acid            | Others     | 18 | 27 | 19 |
| Glycerol                 | Others     | 26 | 10 | 13 |
| Ribose                   | Others     | 12 | 16 | 31 |

**Supplementary Table S11.** Ratios between the individual TMS groups for comparison of on-line, off-line and off-line with on-line conditions (OLOPL).

| Metabolite    | Derivatives | On-line | Off-line | OLOPL |
|---------------|-------------|---------|----------|-------|
| Leucine       | 1TMS/2TMS   | 0.23    | 0.14     | 0.13  |
| Phenylalanine | 2TMS/1TMS   | 1.68    | 0.58     | 0.62  |
| Threonine     | 2TMS/3TMS   | 8.21    | 0.42     | 0.52  |
| Valine        | 1TMS/2TMS   | 0.21    | 0.12     | 0.11  |

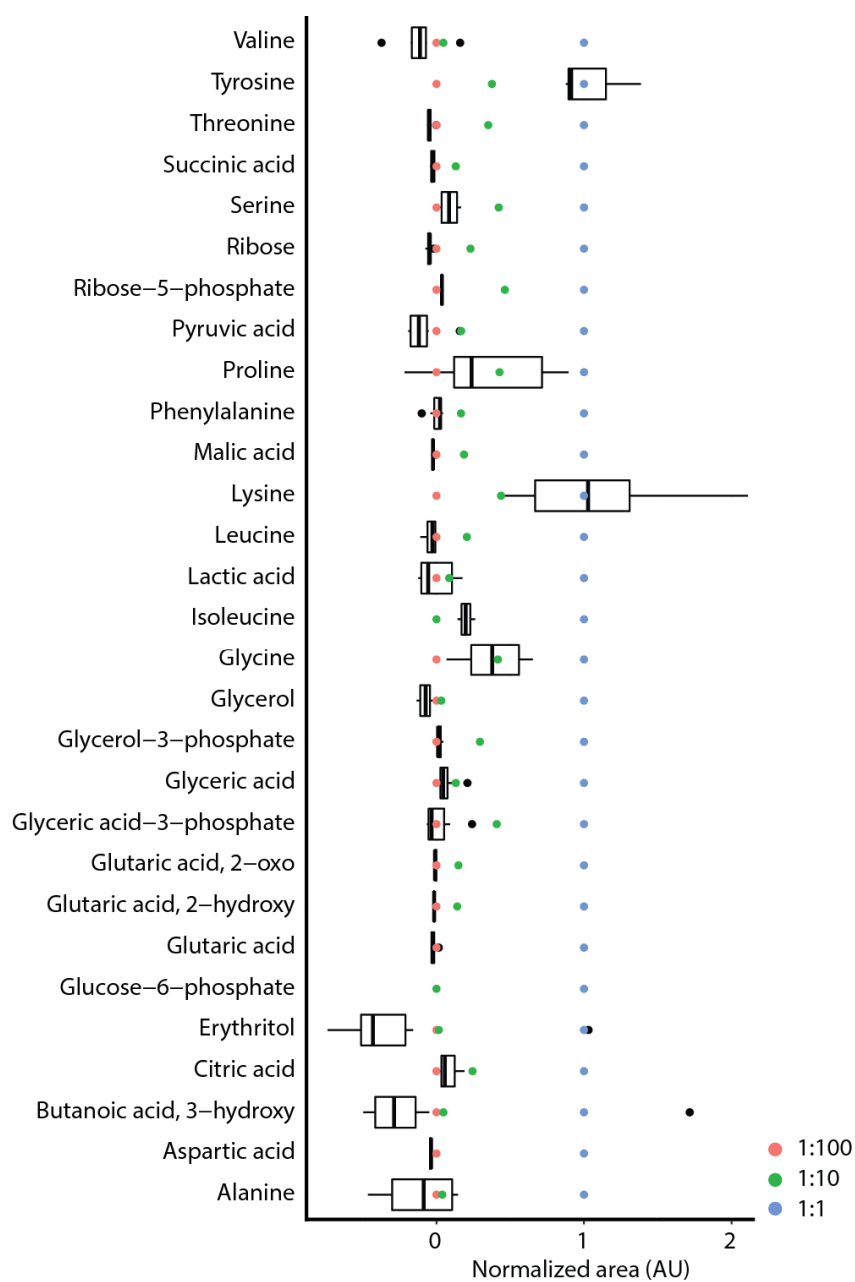

**Supplementary Figure S1.** Concentration range of 29/42 detected compounds in human plasma. A calibration mixture with high (1:1), middle (1:10) and low (1:100) concentrations were used (one replicates for calibration mixture and n=12 for plasma). A minimum/maximum normalization was performed on the calibration mixture for the single compounds.

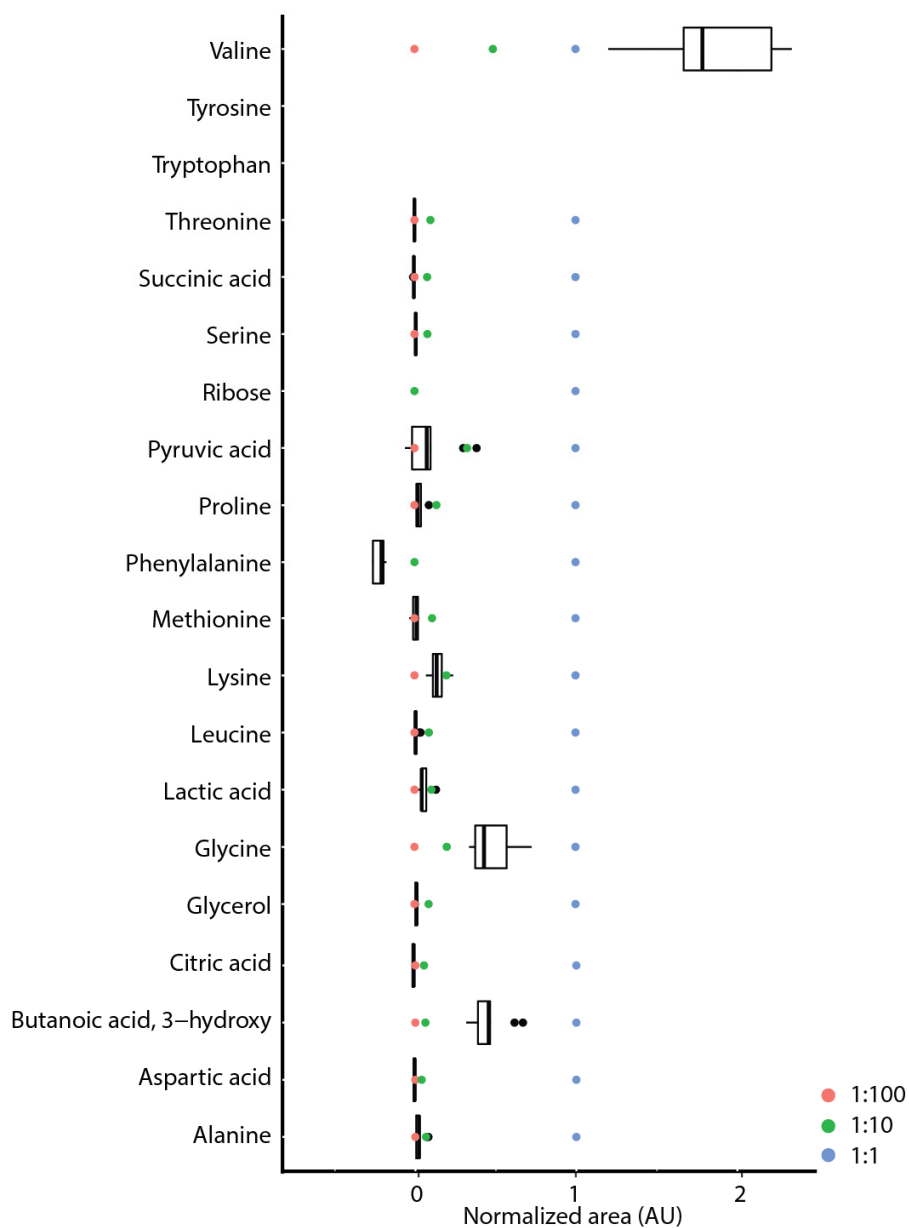

**Supplementary Figure S2.** Concentration range of 18/42 detected compounds in human serum (pooled quality control samples). A calibration mixture with high (1:1), middle (1:10) and low (1:100) concentrations were used (one replicate for calibration mix and n=9 serum samples). A minimum/maximum normalization was performed on the calibration mixture for the single compounds.

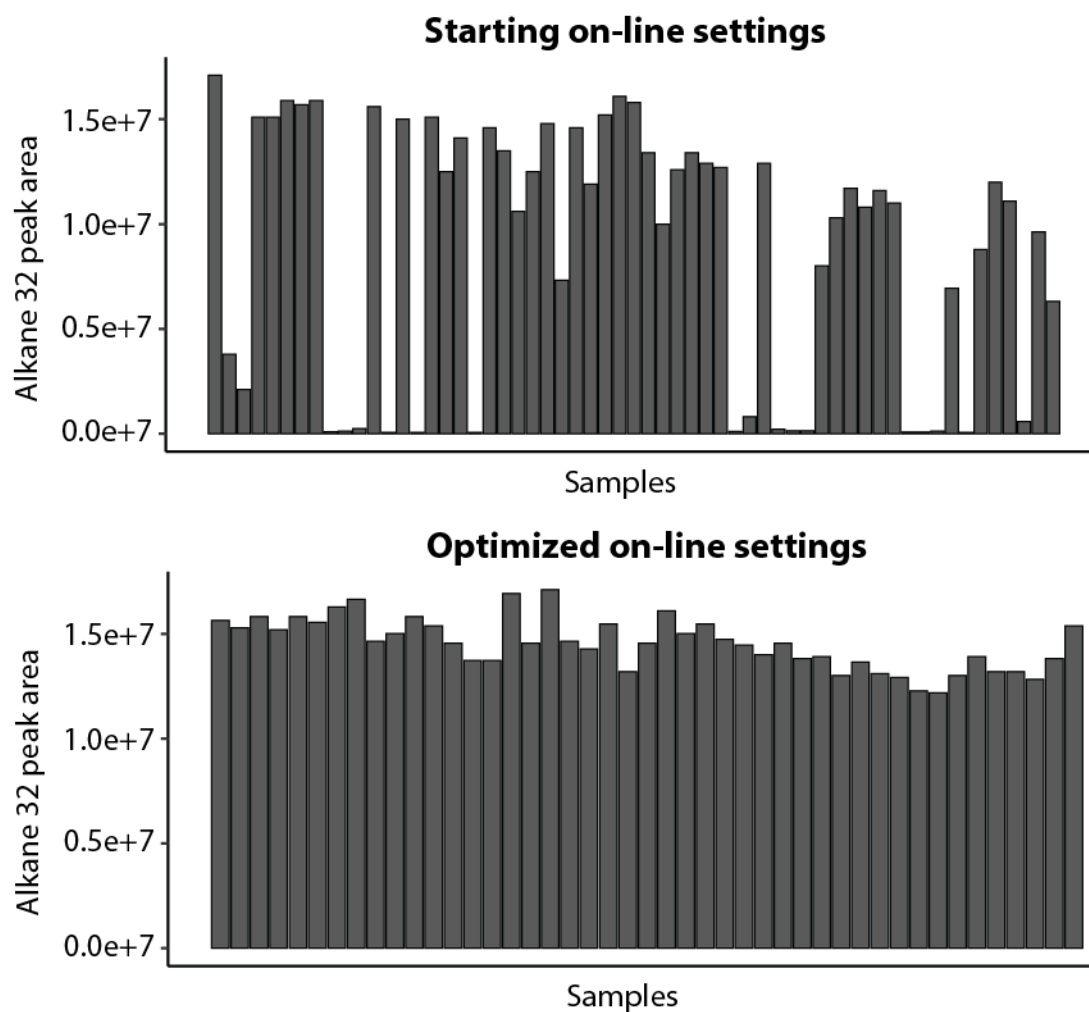

**Supplementary Figure S3.** Comparison of initial (starting on-line settings) and optimized (optimized on-line settings) auto sampler settings. The relative standard deviation of alkane 32 and the number of failed injections decreased from 68% to 8% and 18/59 (31%) to 0/42 (0%) in human plasma or solvent only, respectively.

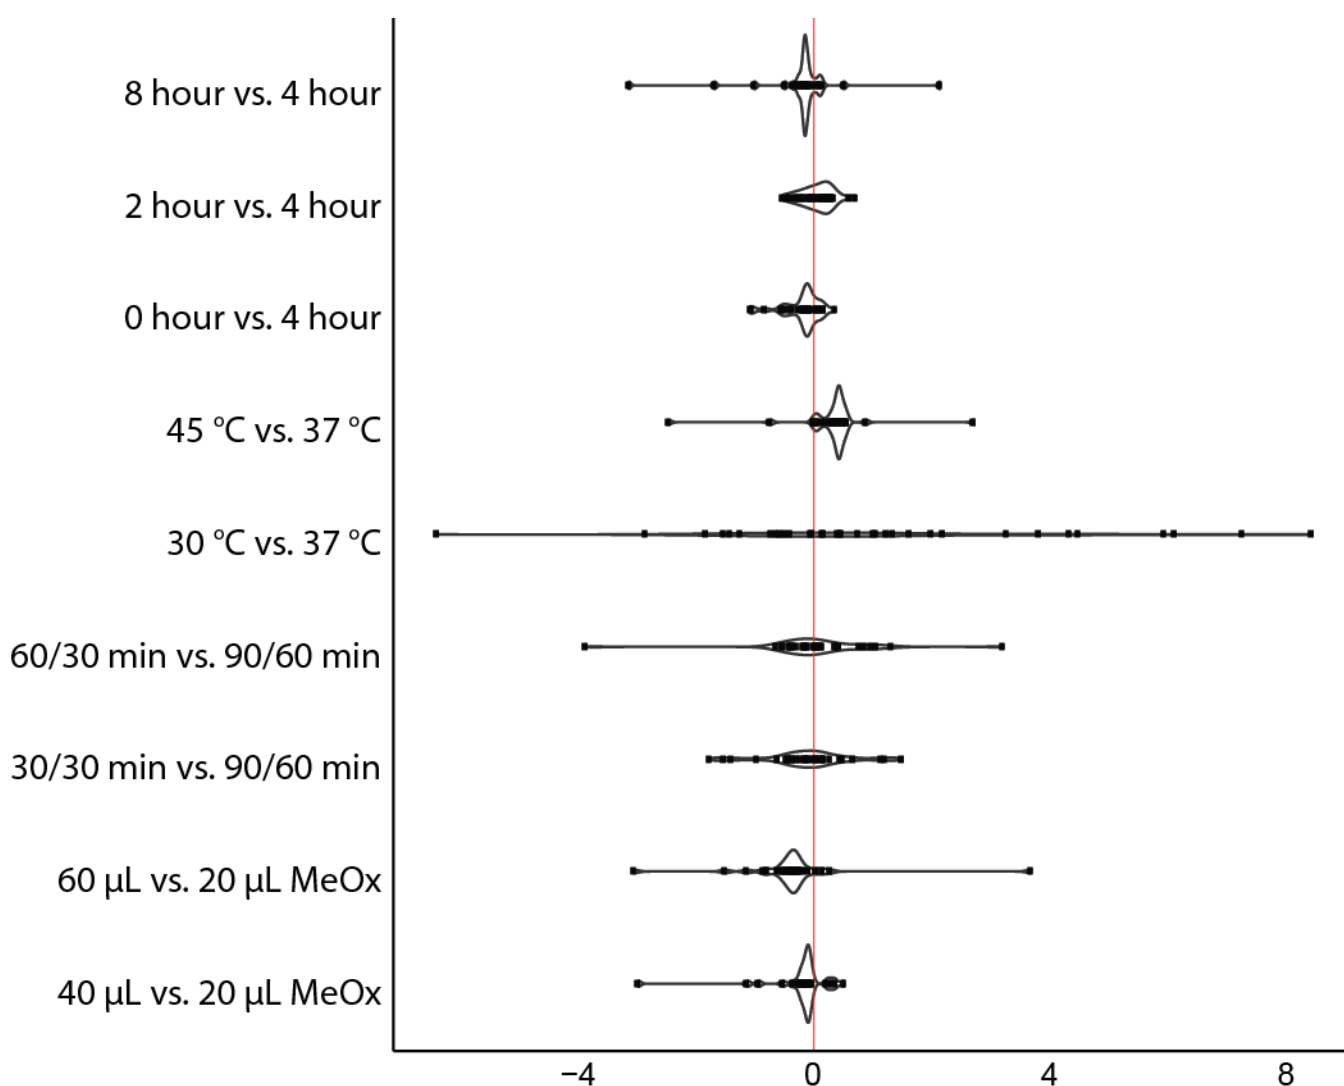

**Supplementary Figure S4.** Violin plots showing the distribution of the normalized peak area ( $\log_2$  from metabolite normalized area ratio) compared to the original parameters.

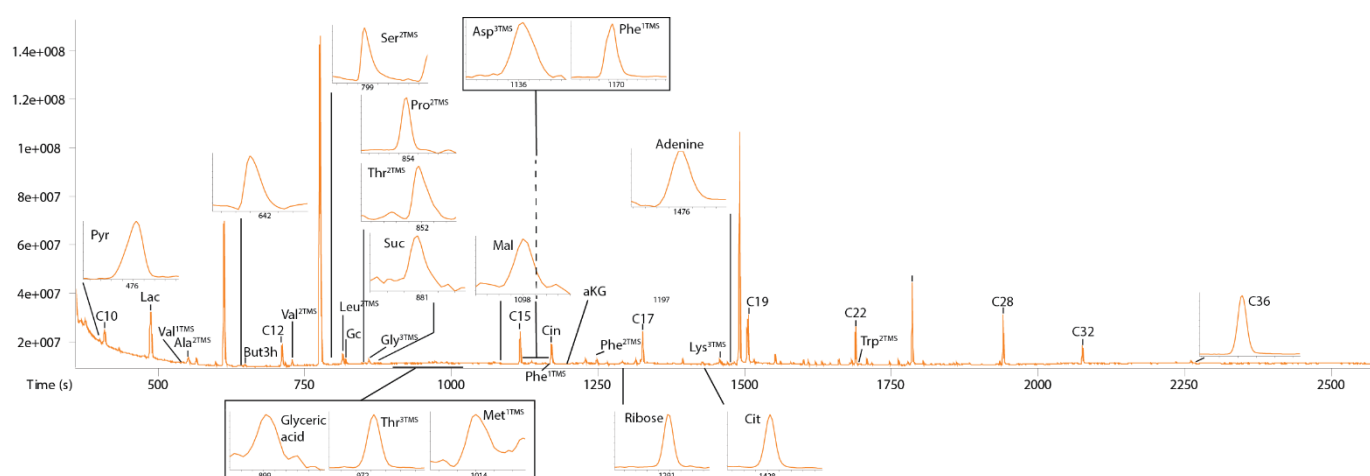

**Supplementary Figure S5.** Total ion chromatogram of a representative plasma sample analyzed with on-line derivatization. Insets display a composite of the extracted ion chromatograms for the top 3 masses for the requisite compounds. Compounds which have



---

persistently poor peak shapes throughout a batch are normally removed by successive quality control checks before processing to statistical analysis.
